# Supplementary material for: MiR-483 induces senescence of human adipose-derived mesenchymal stem cells through IGF1 inhibition
Source: publisher site journal article supplement (doi:10.18632/aging.103818), 2020-08-15
Supplement: Supplementary file [file aging-v12i15-103818-supplementary-material-SD1.pdf]

SUPPLEMENTARY FIGURES

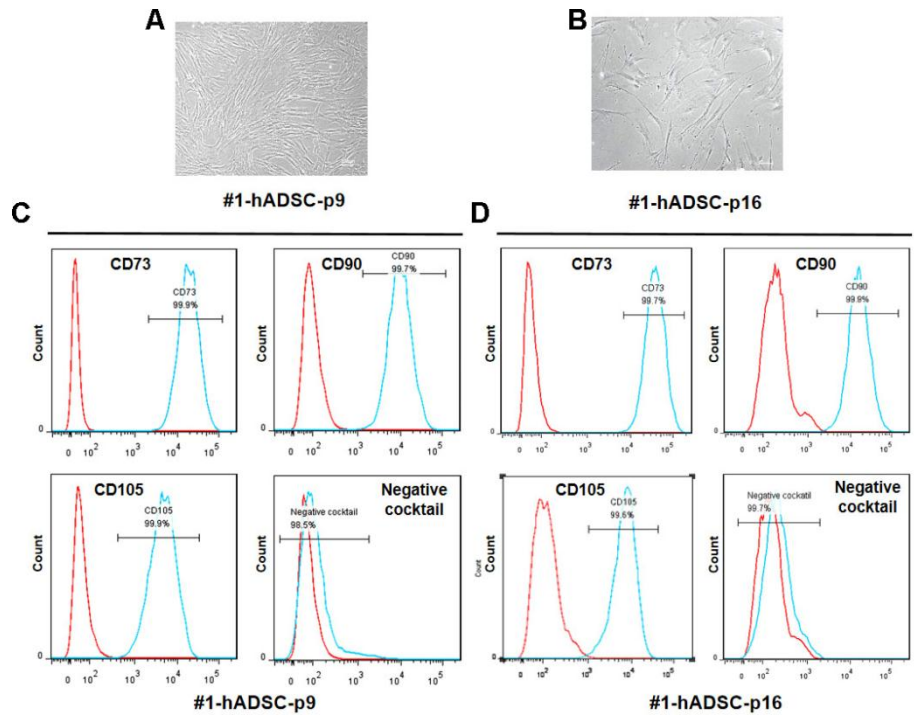

Supplementary Figure 1. Senescence phenotype of hADSCs at different passages. (A, B) The morphology of donor #1 hADSCs was observed under a microscope at P9 and P16. (C, D) Immunophenotypic characterization of #1hADSCs at P9 and P16 by flow cytometry.

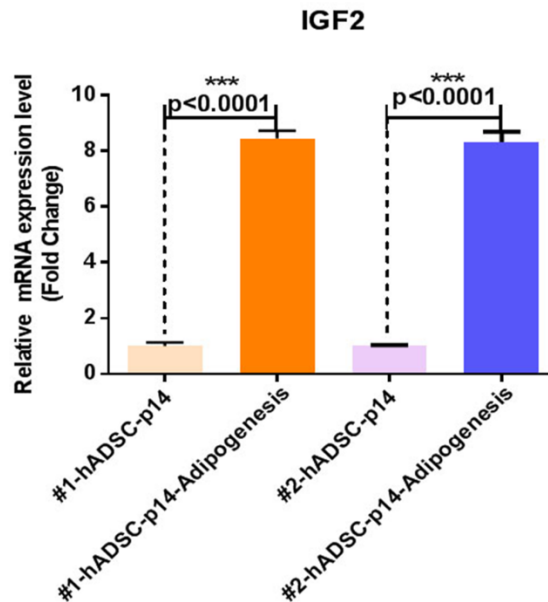

Supplementary Figure 2. IGF2 expression during adipogenic differentiation of hADSCs was analyzed by RT-qPCR.

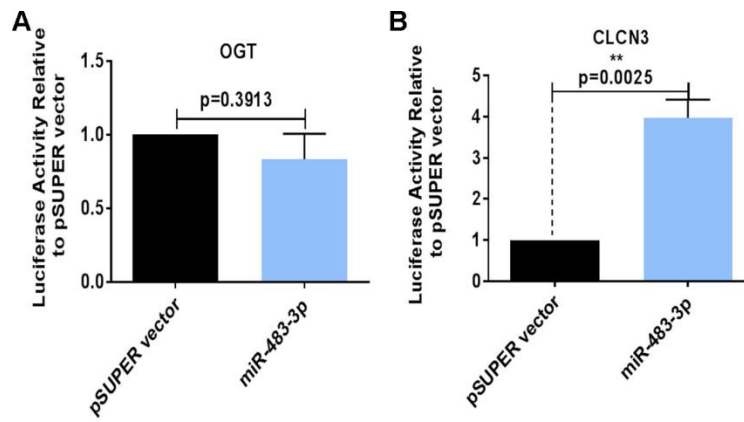

**Supplementary Figure 3. Luciferase reporter assay analysis of miR-483 potential target genes.** (A, B) Luciferase reporter activity in HEK-293T cells co-transfected with the luciferase reporter plasmid containing *OGT* and *CLCN3* 3'UTRs and wild-type pSUPER-miR-483-3p or empty pSUPER vector. Luciferase activity was assayed 32 hours after transfection.
